# Supplementary material
Source: Springer Nature journal article supplement (https://www.springermedizin.de/resource/supplementary/12885_2013_4394_MOESM8_ESM.pdf/9466188)

**Tumor generated from  
CD24+ selected cells**

**Tumor generated from  
CD24- selected cells**

**H&E**

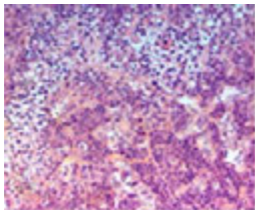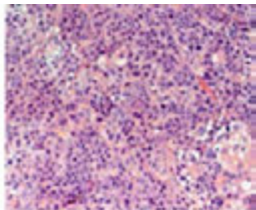

**CD24**

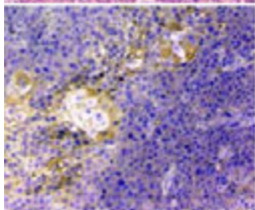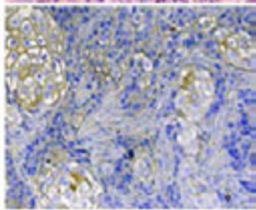

**CD44**

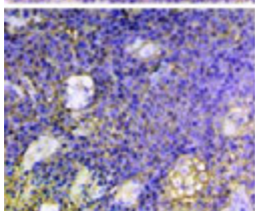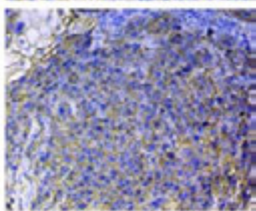

Supplement: MOESM8 [file 9466188]
